# Supplementary material for: RNA-seq reveals the involvement of key genes for aerobic adaptation in rice
Source: PubMed Central journal article supplement (PMC6437204; doi:10.1038/s41598-019-41703-2), 2019-03-27
Supplement: 41598_2019_41703_MOESM1_ESM.pdf [file 41598_2019_41703_MOESM1_ESM.pdf]

## **RNA-seq reveals the involvement of key genes for aerobic adaptation in rice**

Amol S. Phule<sup>ab</sup>, Kalyani M. Barbadikar<sup>a</sup>, Sheshu Madhav Maganti<sup>a</sup>, P. Seguttuvel<sup>a</sup>, D. Subrahmanyam<sup>a</sup>, M.B.B. Prasad Babu<sup>a</sup> and Polumetla A. Kumar<sup>a\*</sup>

<sup>a</sup> Biotechnology Division, ICAR-Indian Institute of Rice Research, Hyderabad 30, India

<sup>b</sup> Institute of Biotechnology, Professor Jayashankar Telangana State Agricultural University, Hyderabad 30, India

\*Correspondence: Polumetla Ananda Kumar

ICAR- Indian Institute of Rice Research

Rajendranagar, Hyderabad-500030

Telangana, India

E-mail: polumetla@hotmail.com

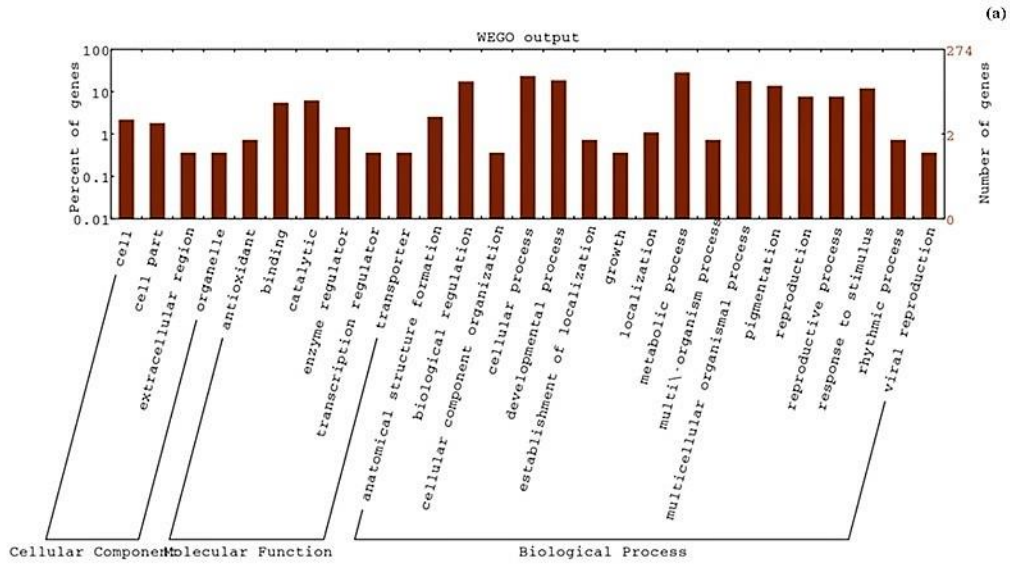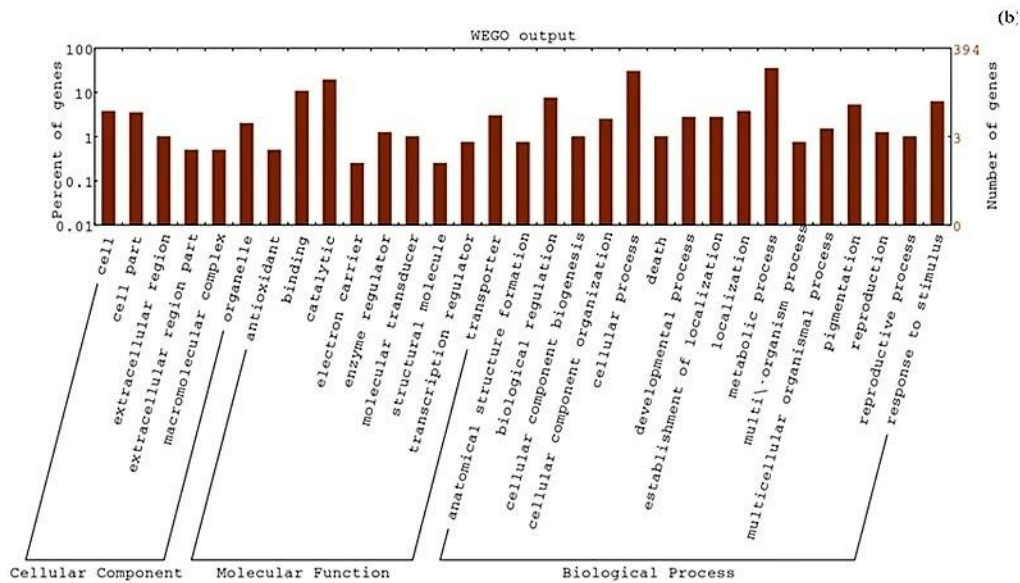

**Fig. S1. GO enrichment analysis for DETs in shoot (BAS vs. CAS) and in root (BAR vs. CAR) under aerobic conditions.** The categories of biological processes (BP) most significant followed by molecular function (MF) and cellular component GO terms in (a) shoot and (b) root are shown from top to bottom.

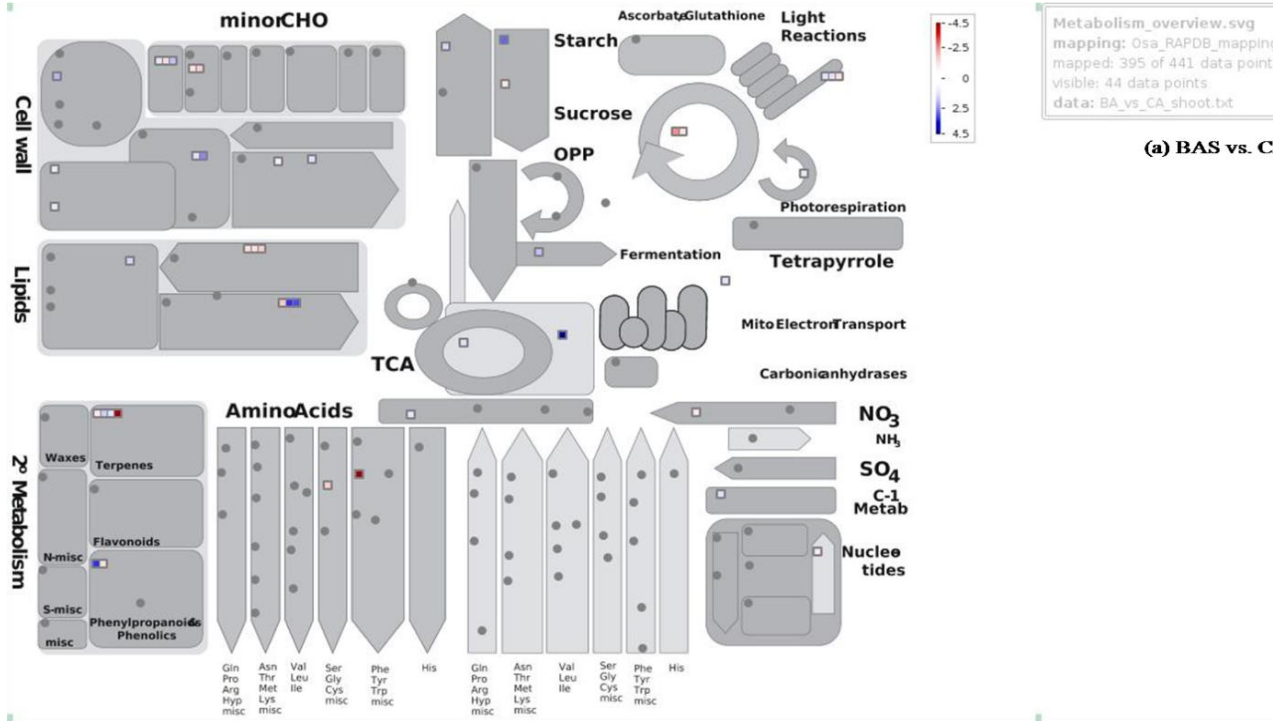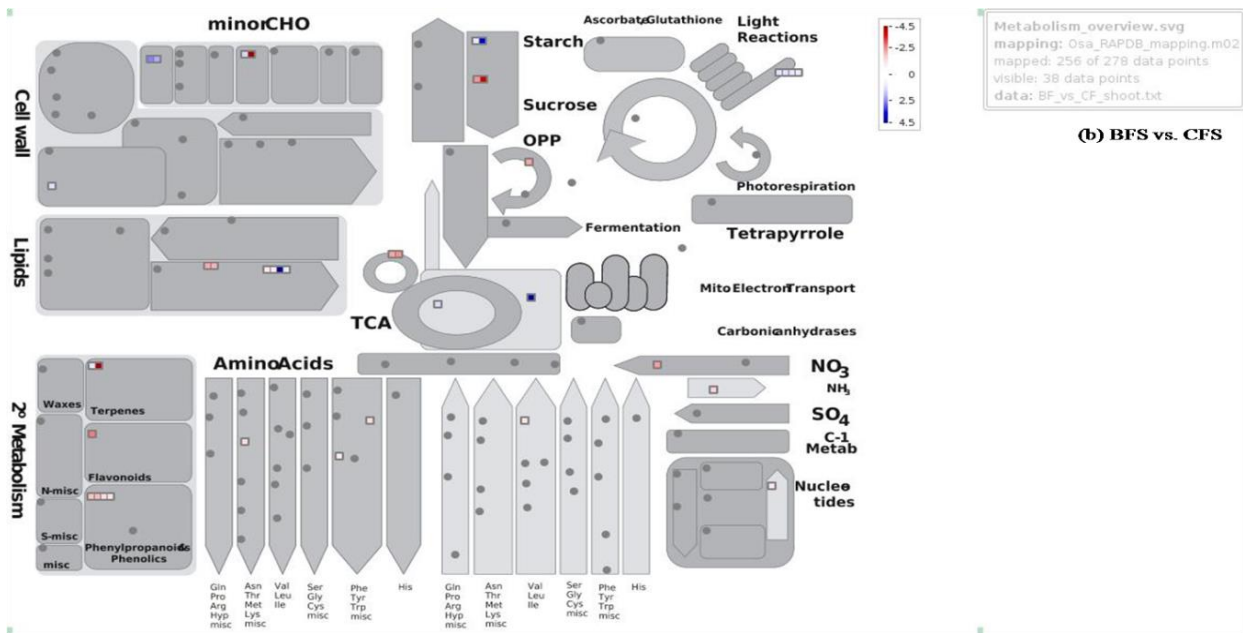

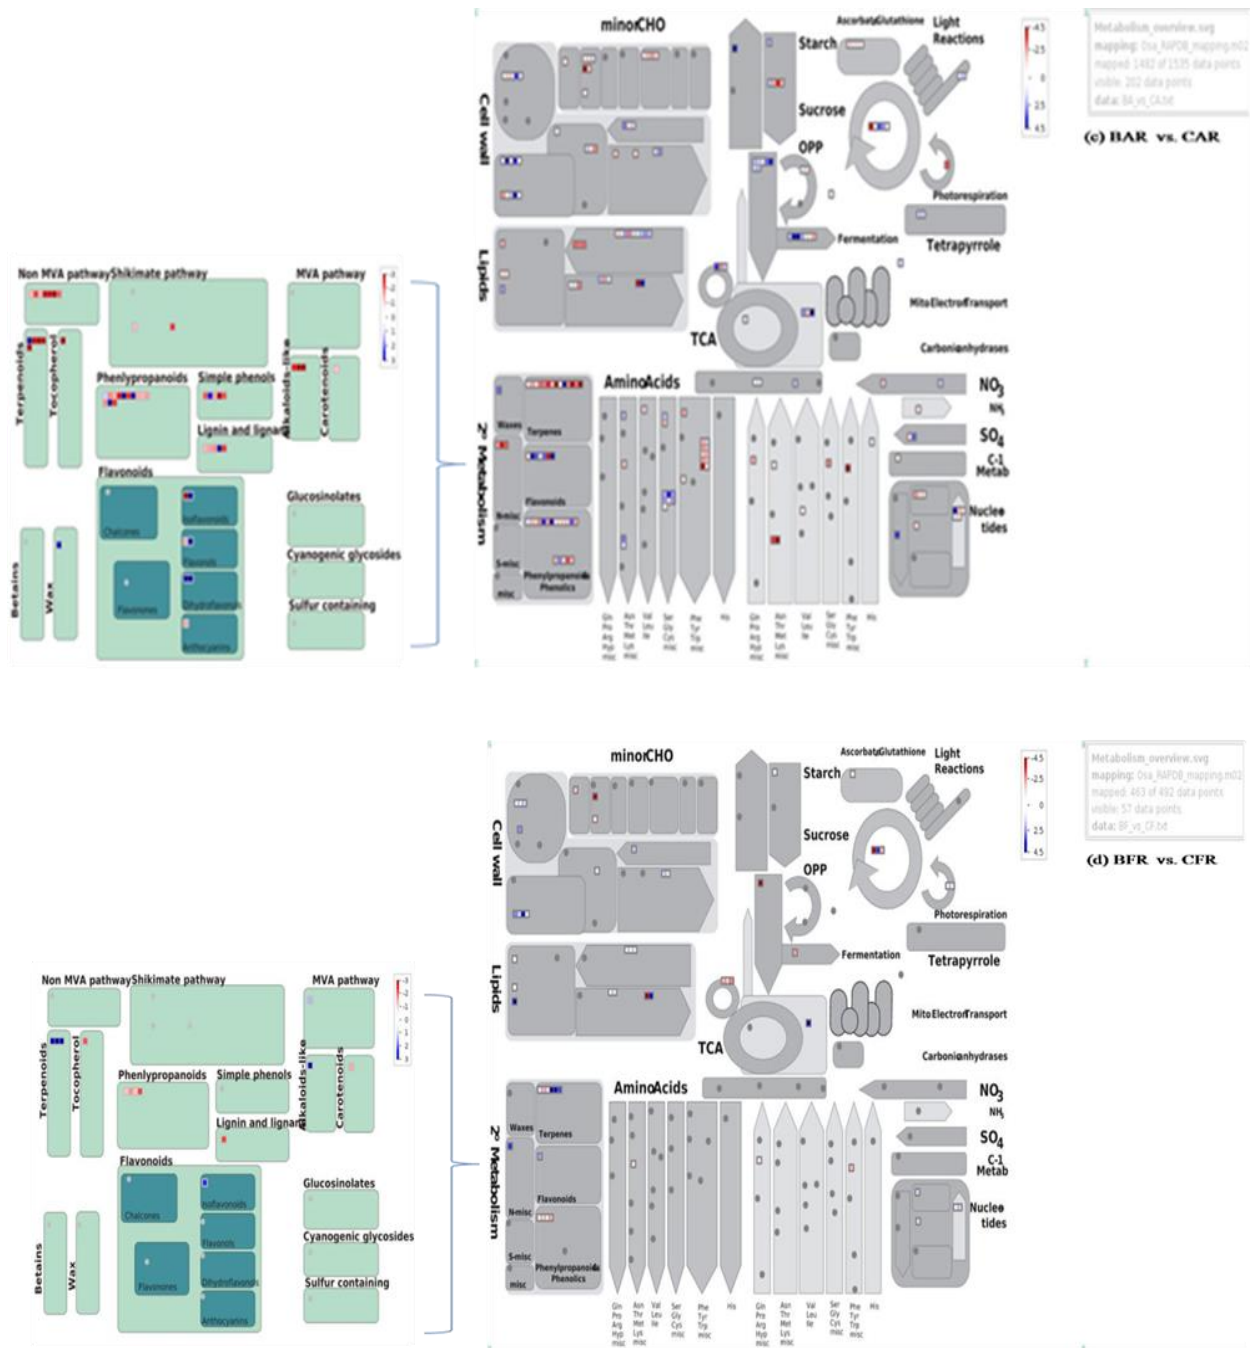

**Fig. S2. Overall metabolism operating under aerobic and anaerobic conditions in shoot (a) BAS vs. CAS, (b) BFS vs. CFS and in root (c) BAR vs. CAR, (d) BFR vs. CFR.**

Transcripts highlighted in insight involved in secondary metabolism processes are shown in the main panel in dark green, while putatively associated transcripts are shown in light green. Blue denotes up-regulation and red down-regulation.

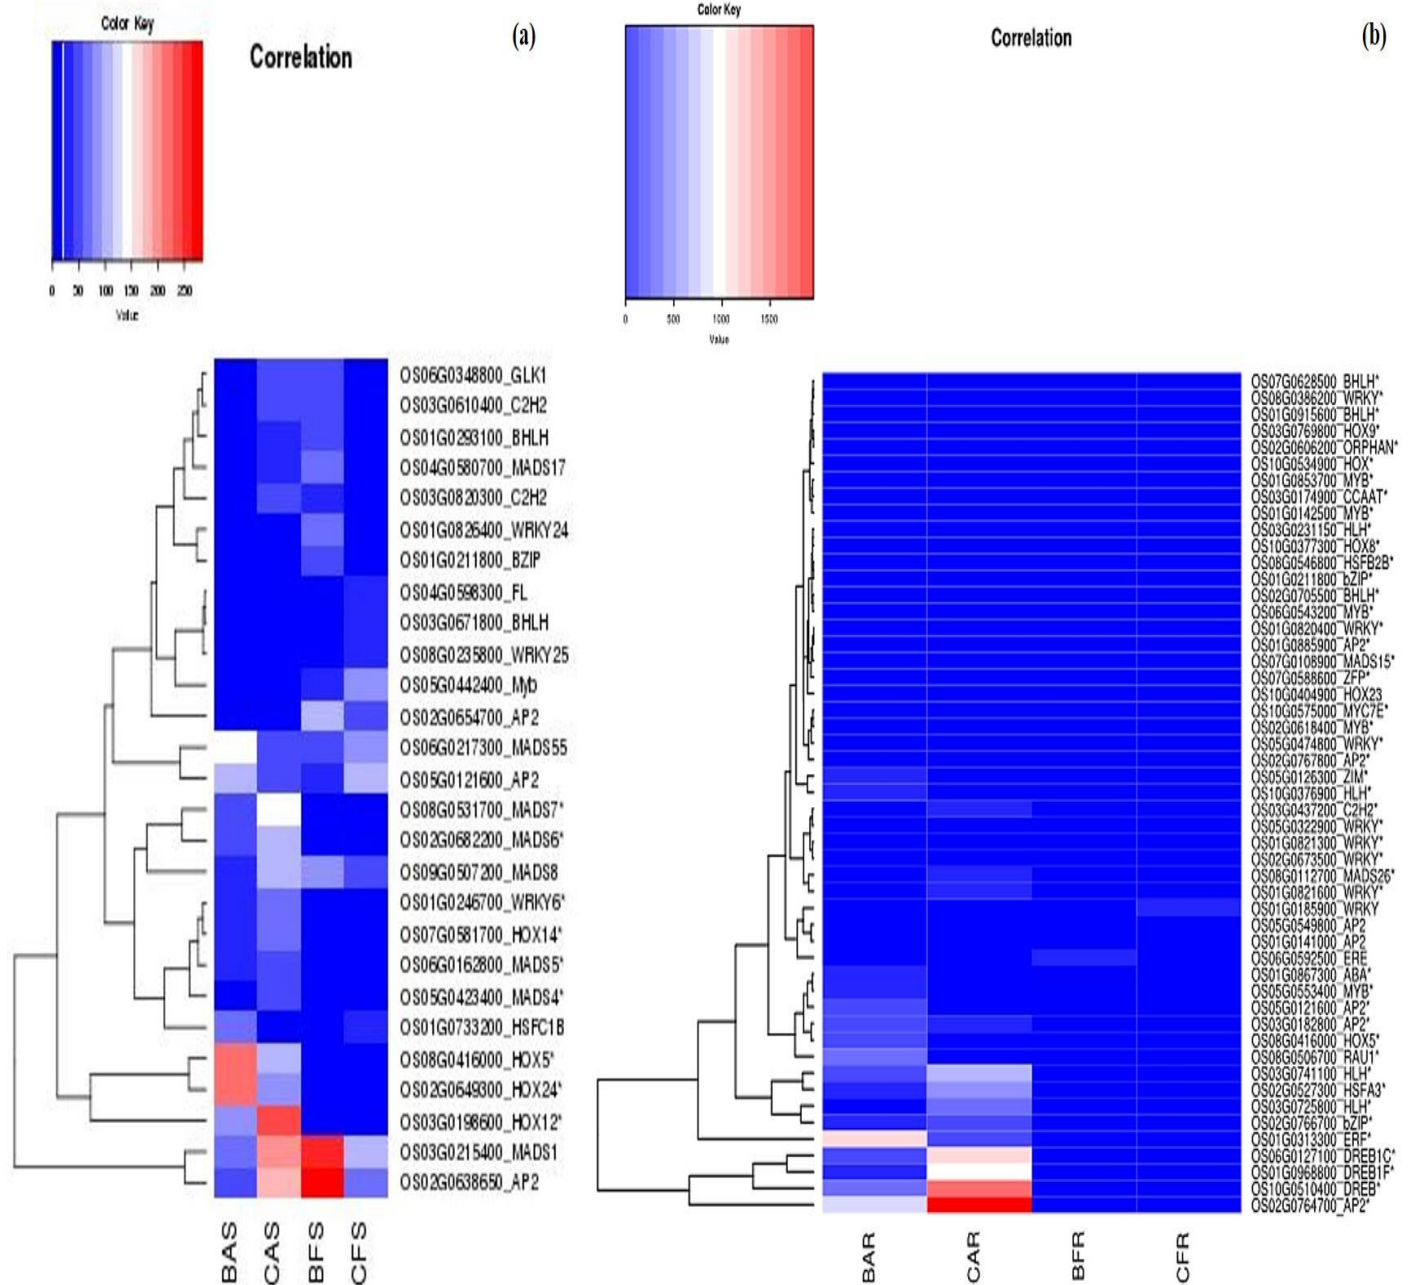

**Fig. S3. Heatmaps representation of differentially expressed TFs (mentioned on the right side) (a) in shoot (BAS, CAS, BFS, CFS) and (b) in root (BAR, CAR, BFR, CFR) under aerobic and anaerobic conditions. The color scale at the top shows expression values in read count. Red represents high levels of expression and blue indicates low levels (\* symbol denotes exclusively expressed TFs in shoot and root of aerobic adapted cultivar CR Dhan 202 under aerobic condition).**

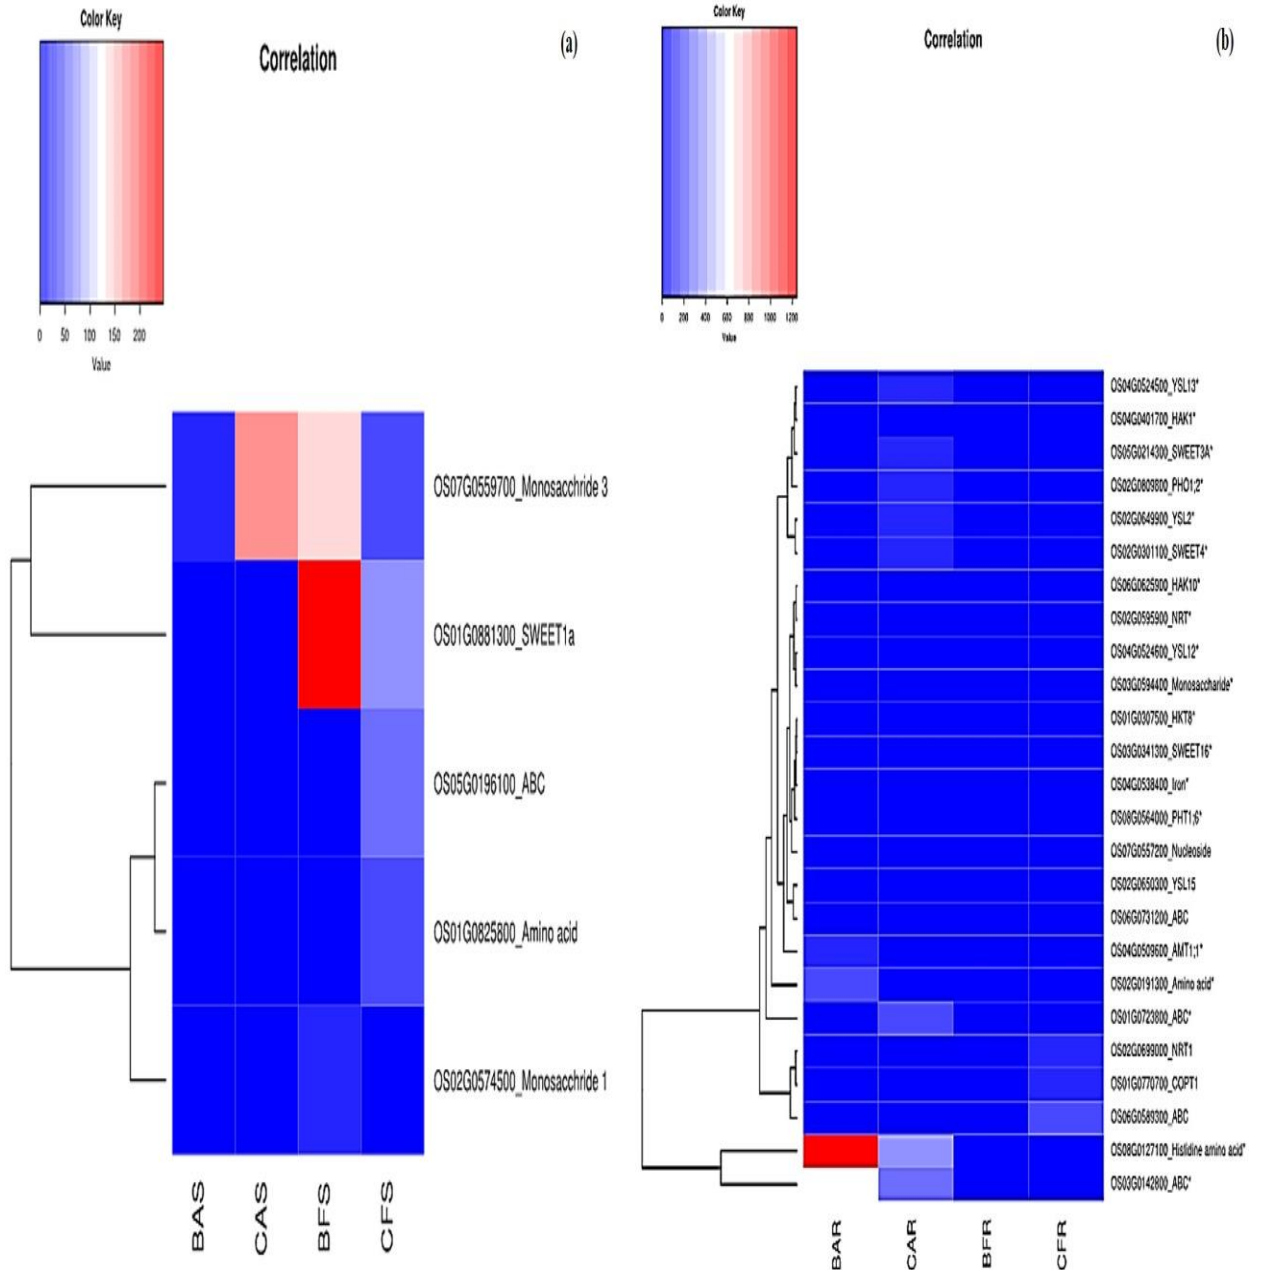

**Fig. S4. Heatmaps representation of differentially expressed transporters (mentioned on the right side) (a) in shoot (BAS, CAS, BFS, CFS) and (b) in root (BAR, CAR, BFR, CFR) under aerobic and anaerobic conditions. The color scale at the top shows expression values in read count. Red represents high levels of expression and blue indicates low levels (\* symbol denotes exclusively expressed transporters in shoot and root of aerobic adapted cultivar CR Dhan 202 under aerobic condition).**



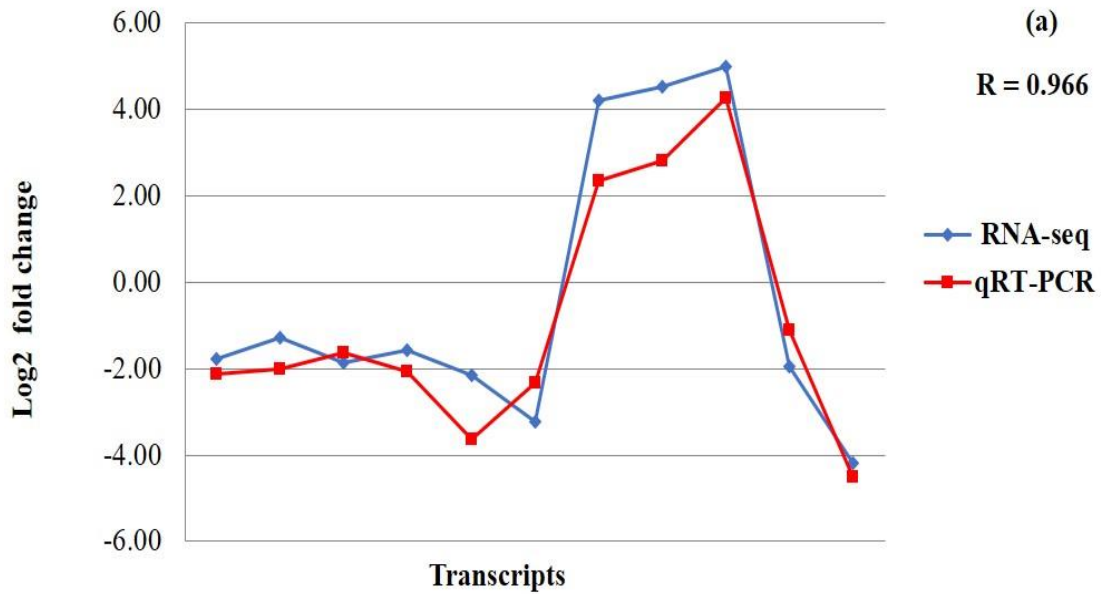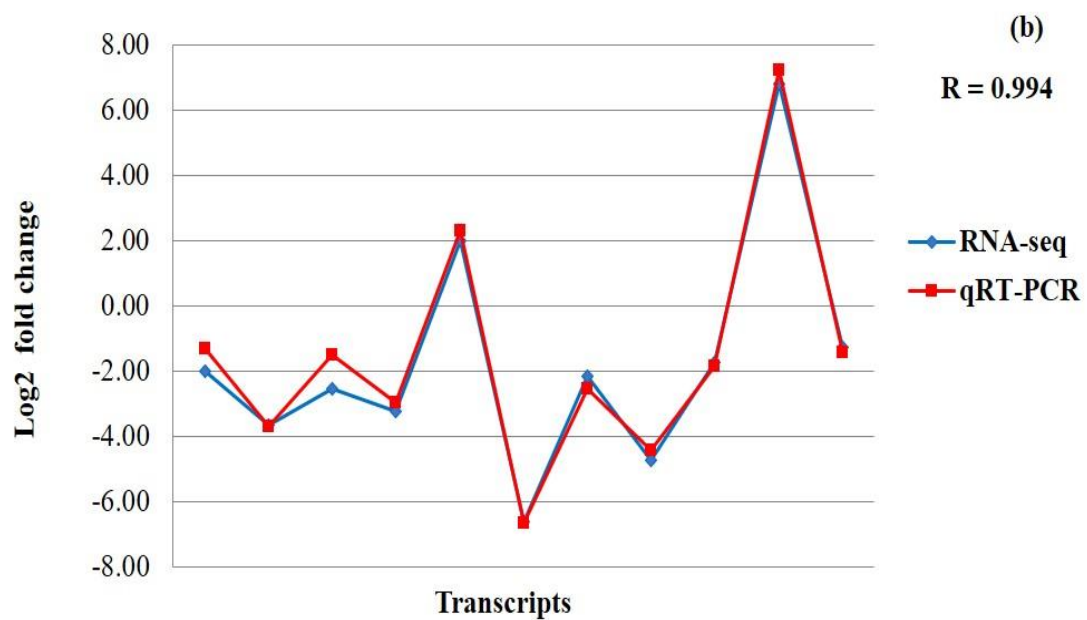

**Fig. S5. Validation of the expression of representative transcripts from RNA-seq using qRT-PCR in (a) shoot (BAS vs. CAS) and in (b) root (BAR vs. CAR) under aerobic conditions.**

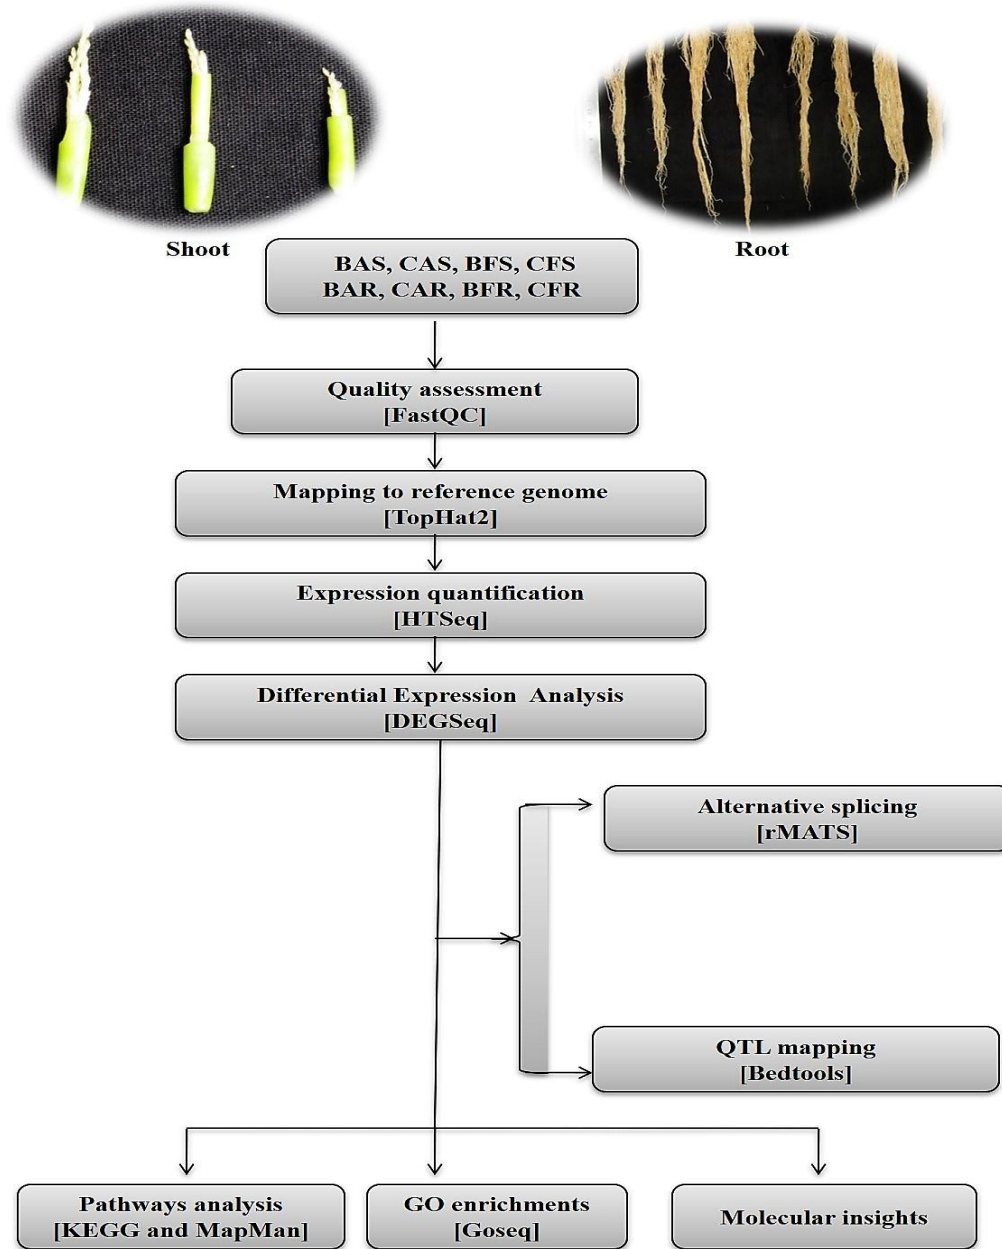

**Fig. S6. Workflow/ summary of RNA-seq data analysis in shoot and root under aerobic and anaerobic conditions.**

BAS - BPT 5204 Aerobic Shoot, CAS - CR Dhan 202 Aerobic Shoot, BAR - BPT 5204 Aerobic Root, CAR - CR Dhan 202 Aerobic Root, BFS - BPT 5204 Anaerobic Shoot, CFS - CR Dhan 202 Anaerobic Shoot, BFR - BPT 5204 Anaerobic Root and CFR - CR Dhan 202 Anaerobic Root



**Table S1. Differentially expressed transcripts (DETs) in shoot (BAS vs. CAS) (BAF vs. CFS) and root (BAR vs. CAR) (BFR vs. CFR) under aerobic and anaerobic conditions (Please see the supplementary excel file).**

**Table S2. Top ten KEGG pathway enrichment analysis of the DETs of shoot and root under aerobic and anaerobic conditions.**

| Term                                    | Database     | ID       | Input number | Background number | P-Value         | Corrected P-Value |
|-----------------------------------------|--------------|----------|--------------|-------------------|-----------------|-------------------|
| <b>BAS vs. CAS</b>                      |              |          |              |                   |                 |                   |
| Fatty acid degradation                  | KEGG PATHWAY | osa00071 | 5            | 38                | 0.0001<br>98021 | 0.0066088<br>24   |
| Glyoxylate and dicarboxylate metabolism | KEGG PATHWAY | osa00630 | 6            | 63                | 0.0002<br>31889 | 0.0066088<br>24   |
| Galactose metabolism                    | KEGG PATHWAY | osa00052 | 4            | 48                | 0.0041<br>34657 | 0.0657114<br>73   |
| Tryptophan metabolism                   | KEGG PATHWAY | osa00380 | 3            | 24                | 0.0046<br>11331 | 0.0657114<br>73   |
| Thiamine metabolism                     | KEGG PATHWAY | osa00730 | 2            | 9                 | 0.0080<br>52586 | 0.0799734<br>96   |
| Fatty acid metabolism                   | KEGG PATHWAY | osa01212 | 4            | 60                | 0.0086<br>32145 | 0.0799734<br>96   |
| Metabolic pathways                      | KEGG PATHWAY | osa01100 | 30           | 1492              | 0.0098<br>21307 | 0.0799734<br>96   |
| Plant-pathogen interaction              | KEGG PATHWAY | osa04626 | 5            | 105               | 0.0127<br>65287 | 0.0898485<br>42   |
| Peroxisome                              | KEGG PATHWAY | osa04146 | 4            | 70                | 0.0141<br>86612 | 0.0898485<br>42   |
| <b>BFS vs. CFS</b>                      |              |          |              |                   |                 |                   |
| Metabolic pathways                      | KEGG PATHWAY | osa01100 | 63           | 1492              | 1.8433<br>4E-06 | 0.0011981<br>68   |
| Biosynthesis of secondary metabolites   | KEGG PATHWAY | osa01110 | 39           | 800               | 9.8663<br>E-06  | 0.0032065<br>48   |
| Fatty acid degradation                  | KEGG PATHWAY | osa00071 | 6            | 38                | 0.0003<br>80693 | 0.0189637<br>75   |
| alpha-Linolenic acid metabolism         | KEGG PATHWAY | osa00592 | 6            | 39                | 0.0004<br>31204 | 0.0189637<br>75   |
| Terpenoid backbone biosynthesis         | KEGG PATHWAY | osa00900 | 6            | 40                | 0.0004<br>86793 | 0.0197759<br>58   |
| Cutin, suberine and wax biosynthesis    | KEGG PATHWAY | osa00073 | 4            | 16                | 0.0008<br>45517 | 0.0289255<br>91   |
| Plant-pathogen interaction              | KEGG PATHWAY | osa04626 | 9            | 105               | 0.0009<br>40201 | 0.0305565<br>34   |
| Photosynthesis - antenna proteins       | KEGG PATHWAY | osa00196 | 4            | 17                | 0.0010<br>26452 | 0.0317711<br>34   |
| Thiamine metabolism                     | KEGG PATHWAY | osa00730 | 3            | 9                 | 0.0020<br>04785 | 0.0328503<br>76   |
| <b>BAR vs. CAR</b>                      |              |          |              |                   |                 |                   |
| Biosynthesis of secondary metabolites   | KEGG PATHWAY | osa01110 | 71           | 800               | 8.0196<br>4E-08 | 7.29787E-<br>06   |
| Metabolic pathways                      | KEGG         | osa01100 | 103          | 1492              | 8.5882          | 0.0003101         |

|                                                     |              |          |    |     |             |             |
|-----------------------------------------------------|--------------|----------|----|-----|-------------|-------------|
|                                                     | PATHWAY      |          |    |     | 4E-06       | 02          |
| Glycolysis / Gluconeogenesis                        | KEGG PATHWAY | osa00010 | 19 | 125 | 1.02231E-05 | 0.000310102 |
| Biosynthesis of amino acids                         | KEGG PATHWAY | osa01230 | 22 | 193 | 0.000115963 | 0.002638161 |
| Phenylalanine, tyrosine and tryptophan biosynthesis | KEGG PATHWAY | osa00400 | 8  | 39  | 0.00070072  | 0.012753099 |
| Phenylpropanoid biosynthesis                        | KEGG PATHWAY | osa00940 | 14 | 113 | 0.000935942 | 0.014195117 |
| Carbon metabolism                                   | KEGG PATHWAY | osa01200 | 22 | 235 | 0.001348053 | 0.017524693 |
| Arginine and proline metabolism                     | KEGG PATHWAY | osa00330 | 7  | 35  | 0.001706147 | 0.019407426 |
| Starch and sucrose metabolism                       | KEGG PATHWAY | osa00500 | 16 | 156 | 0.002553126 | 0.025814936 |
| <b>BFR vs. CFR</b>                                  |              |          |    |     |             |             |
| Arachidonic acid metabolism                         | KEGG PATHWAY | osa00590 | 2  | 10  | 0.010699255 | 0.159986991 |
| Plant hormone signal transduction                   | KEGG PATHWAY | osa04075 | 7  | 177 | 0.011914325 | 0.159986991 |
| Biosynthesis of secondary metabolites               | KEGG PATHWAY | osa01110 | 19 | 800 | 0.014062773 | 0.159986991 |
| Pyruvate metabolism                                 | KEGG PATHWAY | osa00620 | 4  | 72  | 0.018745371 | 0.159986991 |
| Phenylpropanoid biosynthesis                        | KEGG PATHWAY | osa00940 | 5  | 113 | 0.021012259 | 0.159986991 |
| Linoleic acid metabolism                            | KEGG PATHWAY | osa00591 | 2  | 15  | 0.021103488 | 0.159986991 |
| Carbon fixation in photosynthetic organisms         | KEGG PATHWAY | osa00710 | 4  | 75  | 0.021289591 | 0.159986991 |
| Starch and sucrose metabolism                       | KEGG PATHWAY | osa00500 | 6  | 156 | 0.021693151 | 0.159986991 |
| Glycolysis / Gluconeogenesis                        | KEGG PATHWAY | osa00010 | 5  | 125 | 0.030287904 | 0.1623538   |

**Table S3. Details of uniquely expressed root related transcripts under aerobic conditions in the root of two cultivars.**

| <b>Phenotype</b>                                                | <b>Gene id</b> | <b>BAR read count</b> | <b>CAR read count</b> | <b>Gene name</b> | <b>Gene description</b>             |
|-----------------------------------------------------------------|----------------|-----------------------|-----------------------|------------------|-------------------------------------|
| <b>Root development related genes</b>                           |                |                       |                       |                  |                                     |
| Crown root formation                                            | Os01G0149800   | 52.8                  | 490.9                 | <i>MT2A</i>      | Metallothionein-like protein 2A     |
|                                                                 | Os05G0111300   | 150.1                 | 657.7                 | <i>MT2C</i>      | Metallothionein-like protein 2C     |
|                                                                 | Os01G0974200   | 1144                  | 3471.7                | -                | Metallothionein-like protein 2B     |
| <b>Genes related to physiological functions of root</b>         |                |                       |                       |                  |                                     |
| Root hair development                                           | Os10G0555900   | 6.5                   | 34.6                  | <i>EXPB3</i>     | Expansin-B3                         |
| <b>Genes related to physiological functions of root</b>         |                |                       |                       |                  |                                     |
| P uptake                                                        | Os08G0564000   | 1.6                   | 42.6                  | <i>PHT1;6</i>    | Inorganic phosphate transporter 1-6 |
| K and Na uptake                                                 | Os01G0307500   | 1.9                   | 32.5                  | <i>HKT8</i>      | Cation transporter HKT8             |
| <b>Genes related to utilization of water and micronutrients</b> |                |                       |                       |                  |                                     |
| Water acquisition                                               | Os04G0521100   | 2.6                   | 22.5                  | <i>PIP2;3</i>    | Probable aquaporin PIP2-3           |

**Table S4. Details of alternative splicing (AS) events of differentially expressed transcripts (DETs) in shoot (BAS vs. CAS, BFS vs. CFS) and in root (BAR vs. CAR, BFR vs. CFR) under aerobic and anaerobic conditions.**

| Alternative Splicing (AS) Event    | In shoot              |                         | In root               |                         |
|------------------------------------|-----------------------|-------------------------|-----------------------|-------------------------|
|                                    | Aerobic (BAS vs. CAS) | Anaerobic (BFS vs. CFS) | Aerobic (BAR vs. CAR) | Anaerobic (BFR vs. CFR) |
| Retained intron (RI)               | 380                   | 370                     | 299                   | 297                     |
| Alternative 3' splice site (A3'SS) | 170                   | 159                     | 138                   | 139                     |
| Alternative 5' splice site (A5'SS) | 61                    | 63                      | 61                    | 49                      |
| Skipped exon (SE)                  | 47                    | 46                      | 42                    | 42                      |
| Mutual exclusive exons (MXE)       | 1                     | 1                       | 1                     | 0                       |

**Table S5. Details of primers used for shoot (a) and root (b) RNA-seq data validation through qRT-PCR.**

| S. No                | Gene symbol     | Gene description                       | Locus information | Primer sequence 5' to 3' (forward/reverse)                   | Amplicon length (bp) | Tm (0C) |
|----------------------|-----------------|----------------------------------------|-------------------|--------------------------------------------------------------|----------------------|---------|
| <b>(a) For shoot</b> |                 |                                        |                   |                                                              |                      |         |
| 1                    | <i>OsBURP3</i>  | BURP domain-containing protein 3       | LOC_Os01g53240    | CCAAGCGCAGCTCAATCTTTGC<br>TGGCTTCCTACTGAAGCGATCAAC           | 110                  | 62      |
| 2                    | <i>OsCML15</i>  | Probable calcium-binding protein CML15 | LOC_Os05g31620    | AAGGTGAGGGCGTTCTTCTC<br>ACCAGTCCACGTTTCATCGC                 | 91                   | 62      |
| 3                    | <i>OsGLK1</i>   | Probable transcription factor GLK1     | LOC_Os06g24070    | GCTTCAACTCCAGGTTCAACCA<br>TC<br>AGTCCAAGAGGCAAAGGCAAC<br>C   | 93                   | 62      |
| 4                    | <i>OsHOX12</i>  | Homeobox-leucine zipper protein HOX12  | LOC_Os03g10210    | AGCAAGCTCATGGAGGAGGAG<br>TTC<br>TTCAGCTTCAGCAACTCGGTCT<br>CG | 131                  | 62      |
| 5                    | <i>OsMADS8</i>  | MADS-box transcription factor 8        | LOC_Os09g32948    | TCACTGATCTCCAGAGGAGGGA<br>AC<br>CCACACTTGTCATGCAACTGG        | 98                   | 62      |
| 6                    | <i>OsMT2A</i>   | Metallothionein-like protein 2A        | LOC_Os01g05650    | TGCTCGTGTGTTGTGCGATCAG<br>TCTCCGGGTACATCTTGCATCC<br>TC       | 149                  | 62      |
| 7                    | <i>OsPIP1;3</i> | Aquaporin PIP 1;3                      | LOC_Os02g57720    | ACCGAGTTGATGCTGCAAGATG<br>ATCACCAGACGGTAATAACAC<br>ACG       | 73                   | 62      |
| 8                    | <i>OsRAB21</i>  | Water stress-inducible protein Rab21   | LOC_Os11g26790    | AGCTCAAGCTCGTCTGAGGATG<br>GGGAGCTTCTCCTTGATCTTCT<br>CC       | 80                   | 62      |
| 9                    | <i>OsRAB16B</i> | Dehydrin Rab16B                        | LOC_Os11g26780    | TTCGCACGTGTTGGGTTGTACC<br>ACACACACACCATACAAAGCTT<br>GC       | 65                   | 62      |
| 10                   | <i>OsTPR</i>    | TPR Domain containing protein          | LOC_Os03g19560    | ACAAGCTACCCAATGCAATCCC<br>GACTTGCTGGACTGCTTTCTC              | 122                  | 62      |
| 11                   | <i>Putative</i> | Putative uncharacterized protein       | LOC_Os05g11810    | TCGTGGGAAGTTGAAGCCACTT<br>G<br>TCTCCCGTTTCGTTAGAACCCTTG<br>C | 141                  | 62      |
| <b>(a) For root</b>  |                 |                                        |                   |                                                              |                      |         |
| 1                    | <i>HLH</i>      | Helix-loop-helix DNA-binding domain    | LOC_Os03g51580    | TCCCAGAACCAGGAACACATCC<br>CGACGCCTTGTCATCTTCTTG              | 114                  | 62      |



|    |                 |                                                           |                |                                                              |     |    |
|----|-----------------|-----------------------------------------------------------|----------------|--------------------------------------------------------------|-----|----|
|    |                 | containing protein                                        |                |                                                              |     |    |
| 2  | <i>OsBK11</i>   | Brassinosteroid insensitive1-associated receptor kinase 1 | LOC_Os11g31540 | CATTAGCACCTGCGAAATCTGAG<br>TCGTCAGGCTGCCCAAAGATTG            | 80  | 62 |
| 3  | <i>OsDREB1F</i> | Dehydration-responsive element-binding protein 1F         | LOC_Os01g73770 | TTCGTCCTCGTCGGTGT<br>GCGTCTCCCGGAATTTCTT                     | 110 | 62 |
| 4  | <i>OsMT2A</i>   | Metallothionein-like protein 2A                           | LOC_Os01g05650 | TGCTCGTGTGTTGTGCGATCAG<br>TCTCCGGGTACATCTTGCATCC<br>TC       | 149 | 62 |
| 5  | <i>OsNAC71</i>  | NAC domain-containing protein 71                          | LOC_Os11g08210 | TTAACGGAACGTGACGCCTCTG<br>ACGATCGACCTGACAGTGGTTA<br>G        | 63  | 62 |
| 6  | <i>OsNAS1</i>   | Nicotianamine synthase 1                                  | LOC_Os03g19427 | TGCTGCATTTGCGAAGCTAAGG<br>ACTGTACGTCCCAAACAACACG             | 76  | 62 |
| 7  | <i>OsPHO1;2</i> | Phosphate transporter PHO1;2                              | LOC_Os02g56510 | TAAGCCACAGCAGCCCAGAAAC<br>C<br>AGTGCCCGTGAACAAACCTACG        | 64  | 62 |
| 8  | <i>OsPHT1;6</i> | Inorganic phosphate transporter 1;6                       | LOC_Os08g45000 | TGCAAAGTGTACTGTAGCGCTG<br>TC<br>TGGCGGTTTCTTCGATCGATCT<br>TC | 124 | 62 |
| 9  | <i>OsPIP1;3</i> | Aquaporin PIP 1;3                                         | LOC_Os02g57720 | ACCGAGTTGATGCTGCAAGATG<br>ATCACCAGACGGTAATAACAC<br>ACG       | 73  | 62 |
| 10 | <i>OsRAB21</i>  | Water stress-inducible protein Rab21                      | LOC_Os11g26790 | AGCTCAAGCTCGTCTGAGGATG<br>GGGAGCTTCTCCTTGATCTTCT<br>CC       | 80  | 62 |
| 11 | <i>OsYSL2</i>   | Metal-nicotianamine transporter YSL2                      | LOC_Os02g43370 | ACTTGCTTCCACTCAGAAAGGC<br>GTTGCAGTCCCACTTGGATAGG             | 67  | 62 |
